# Supplementary material for: Isolation, Screening, and Characterization of Plant-Growth-Promoting Bacteria from Durum Wheat Rhizosphere to Improve N and P Nutrient Use Efficiency
Source: PubMed Central journal article supplement (PMC6920805; doi:10.3390/microorganisms7110541), 2019-11-08
Supplement: microorganisms-07-00541-s001.pdf [file microorganisms-07-00541-s001.pdf]

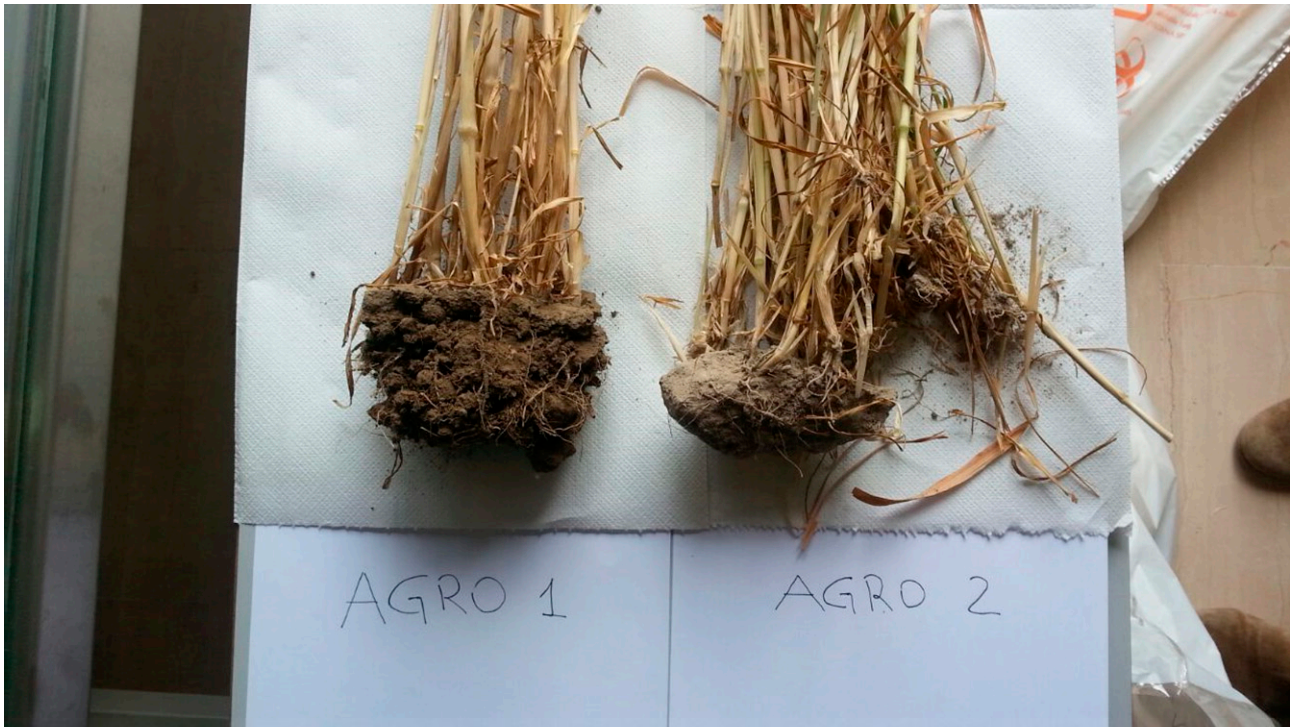

**Figure S1:** Soil samples around the roots

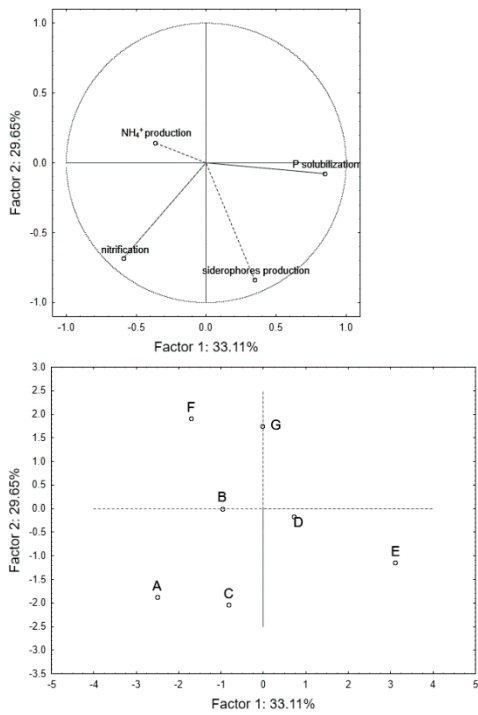

| Isolates                                                                                                            | 1 | 2 | 3 | 4 |
|---------------------------------------------------------------------------------------------------------------------|---|---|---|---|
| <b>A</b> 6P, 15P, 54P, 56P                                                                                          | + | + | - | + |
| <b>B</b> 12P, 14P, 32P, 47P, 53P                                                                                    | + | - | - | + |
| <b>C</b> 19P, 20P, 30P                                                                                              | + | + | + | + |
| <b>D</b> 7P, 8P, 10P, 34P, 35P, 36P, 37P, 38P, 39P, 43P, 44P, 45P, 46P, 48P, 49P, 50P, 51P, 52P, 55P, 57P, 59P, 62P | + | - | + | + |
| <b>E</b> 42P                                                                                                        | - | - | + | + |
| <b>F</b> 26P, 24P, 27P, 29P, 56P                                                                                    | + | - | - | - |
| <b>G</b> 3P, 4P, 60P, 61P, 63P, 64P                                                                                 | + | - | + | - |

1, NH<sub>4</sub><sup>+</sup> production; 2, Nitrification; 3, P-solubilization; 4, siderophore production

**Figure S2:** Principal Component Analysis run on pseudomonads.

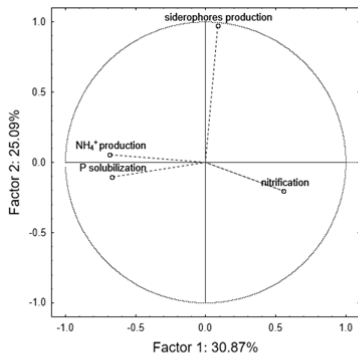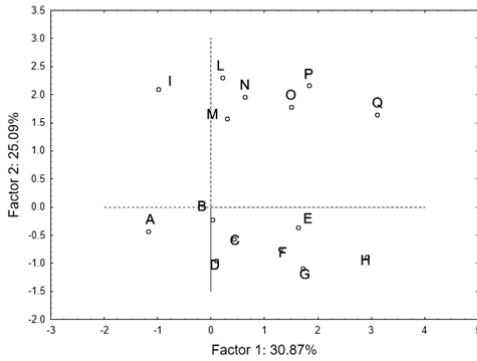

| Isolates                                                                                                                                                                                                         | 1 | 2 | 3 | 4 |
|------------------------------------------------------------------------------------------------------------------------------------------------------------------------------------------------------------------|---|---|---|---|
| <b>A</b> 3A, 6A, 12A, 14A, 17A, 18A, 21A, 23A, 28A, 31A, 48A, 49A, 50A, 56A, 72A, 80A, 84A, 85A, 86A, 90A, 91A, 92A, 93A, 95A, 98A, 105A, 114A, 125A, 130A, 131A, 133A, 141A, 146A, 147A, 149A, 166A, 176A, 177A | + | - | + | - |
| <b>B</b> 7A, 13A, 16A, 22A, 32A, 39A, 2A, 5A, 40A, 44A, 51A, 54A, 55A, 60A, 69A, 70A, 74A, 75A, 87A, 99A, 101A, 102A, 111A, 119A, 143A, 145A, 153A, 157A, 159A, 160A, 164A, 174A                                 | + | - | - | - |
| <b>C</b> 122A, 123A, 132A, 151A, 165A                                                                                                                                                                            | - | - | + | - |
| <b>D</b> 62A, 71A, 100A, 117A, 156A, 158A                                                                                                                                                                        | + | + | + | - |
| <b>E</b> 57A, 79A, 113A, 126A, 144A, 170A, 173A, 175A                                                                                                                                                            | - | - | - | - |
| <b>F</b> 42A, 43A, 61A, 65A, 78A, 97A, 115A, 138A                                                                                                                                                                | + | + | - | - |
| <b>G</b> 83A                                                                                                                                                                                                     | - | + | + | - |
| <b>H</b> 10A, 116A, 136A, 142A                                                                                                                                                                                   | - | + | - | - |
| <b>I</b> 25A, 26A, 82A, 104A, 108A, 124A, 137A                                                                                                                                                                   | + | - | + | + |
| <b>J</b> 8A, 24A, 34A, 38A, 47A, 107A, 129A, 179A                                                                                                                                                                | + | - | - | + |
| <b>K</b> 1A, 103A                                                                                                                                                                                                | + | + | + | + |
| <b>L</b> 109A                                                                                                                                                                                                    | - | - | + | + |
| <b>M</b> 112A                                                                                                                                                                                                    | + | + | - | + |
| <b>N</b> 110A, 167A                                                                                                                                                                                              | - | - | - | + |
| <b>O</b> 148A                                                                                                                                                                                                    | - | + | - | + |

1, NH<sub>4</sub><sup>+</sup> production; 2, Nitrification; 3, P-solubilization; 4, siderophore production

**Figure S3:** Principal Component Analysis run on actinobacteria.

**Table S1:** Second selection. Qualitative codes based on medians and quartiles. P, mineralization of P; IAA, production of indole acetic acid; nitr, nitrification.

**Actinobacteria**

|      | P | IAA | nitr |
|------|---|-----|------|
| 1A   | 0 | 0   | 1    |
| 3A   | 1 | 0   | 0    |
| 10A  | 0 | 0   | 3    |
| 12A  | 3 | 1   | 0    |
| 13A  | 0 | 2   | 0    |
| 17A  | 1 | 1   | 0    |
| 18A  | 0 | 1   | 0    |
| 20A  | 0 | 2   | 0    |
| 23A  | 3 | 0   | 0    |
| 25A  | 3 | 0   | 0    |
| 26A  | 0 | 2   | 0    |
| 28A  | 0 | 1   | 0    |
| 31A  | 1 | 1   | 0    |
| 32A  | 0 | 3   | 0    |
| 37A  | 0 | 1   | 0    |
| 38A  | 0 | 1   | 0    |
| 42A  | 0 | 0   | 3    |
| 47A  | 0 | 1   | 0    |
| 48A  | 2 | 1   | 0    |
| 49A  | 0 | 1   | 0    |
| 50A  | 0 | 1   | 0    |
| 51A  | 0 | 1   | 0    |
| 54A  | 0 | 1   | 0    |
| 55A  | 0 | 1   | 0    |
| 56A  | 0 | 1   | 0    |
| 65A  | 0 | 1   | 0    |
| 71A  | 2 | 1   | 0    |
| 72A  | 0 | 1   | 0    |
| 74A  | 0 | 1   | 0    |
| 75A  | 0 | 1   | 0    |
| 78A  | 0 | 1   | 1    |
| 80A  | 1 | 0   | 0    |
| 84A  | 0 | 1   | 0    |
| 85A  | 0 | 1   | 0    |
| 90A  | 3 | 1   | 0    |
| 92A  | 0 | 1   | 0    |
| 93A  | 1 | 0   | 0    |
| 94A  | 0 | 1   | 0    |
| 95A  | 0 | 3   | 0    |
| 97A  | 0 | 3   | 0    |
| 98A  | 0 | 1   | 0    |
| 100A | 0 | 2   | 2    |
| 103A | 0 | 1   | 1    |
| 104A | 2 | 1   | 0    |
| 105A | 0 | 2   | 0    |
| 107A | 0 | 3   | 0    |
| 108A | 0 | 2   | 0    |
| 109A | 0 | 3   | 0    |
| 110A | 0 | 2   | 0    |
| 111A | 0 | 1   | 0    |
| 112A | 0 | 3   | 3    |

|      |   |   |   |
|------|---|---|---|
| 115A | 0 | 0 | 1 |
| 122A | 1 | 2 | 0 |
| 124A | 0 | 1 | 0 |
| 125A | 0 | 2 | 0 |
| 129A | 0 | 1 | 0 |
| 133A | 0 | 2 | 0 |
| 135A | 0 | 1 | 0 |
| 136A | 0 | 1 | 2 |
| 138A | 0 | 2 | 0 |
| 139A | 0 | 2 | 0 |
| 140A | 0 | 2 | 0 |
| 141A | 0 | 2 | 0 |
| 143A | 0 | 2 | 0 |
| 144A | 0 | 3 | 0 |
| 145A | 0 | 3 | 0 |
| 147A | 0 | 1 | 0 |
| 148A | 0 | 2 | 0 |
| 149A | 1 | 0 | 0 |
| 151A | 2 | 1 | 0 |
| 153A | 0 | 3 | 0 |
| 155A | 0 | 2 | 0 |
| 156A | 0 | 3 | 1 |
| 158A | 0 | 3 | 0 |
| 159A | 0 | 3 | 0 |
| 160A | 0 | 3 | 0 |
| 164A | 0 | 3 | 0 |
| 165A | 1 | 1 | 0 |
| 166A | 0 | 1 | 0 |
| 167A | 0 | 3 | 0 |
| 168A | 0 | 2 | 0 |
| 170A | 0 | 2 | 0 |
| 171A | 0 | 3 | 0 |
| 172A | 0 | 3 | 0 |
| 175A | 0 | 3 | 0 |
| 176A | 0 | 3 | 0 |

## Mesophiles

|      | P | IAA | nitr. |
|------|---|-----|-------|
| 4M   | 3 | 0   | 0     |
| 11M  | 1 | 0   | 0     |
| 16M  | 3 | 0   | 0     |
| 17M  | 2 | 0   | 0     |
| 18M  | 1 | 0   | 0     |
| 19M  | 3 | 0   | 0     |
| 20M  | 3 | 0   | 0     |
| 21M  | 1 | 0   | 0     |
| 22M  | 2 | 0   | 0     |
| 23M  | 2 | 0   | 1     |
| 26M  | 1 | 0   | 0     |
| 27M  | 2 | 1   | 0     |
| 29M  | 1 | 0   | 0     |
| 30M  | 1 | 0   | 0     |
| 32M  | 0 | 0   | 1     |
| 35M  | 3 | 0   | 0     |
| 36M  | 3 | 1   | 1     |
| 38M  | 0 | 0   | 2     |
| 40M  | 3 | 0   | 0     |
| 41M  | 2 | 0   | 0     |
| 43M  | 1 | 0   | 0     |
| 45M  | 0 | 0   | 2     |
| 48M  | 3 | 0   | 0     |
| 50M  | 2 | 1   | 1     |
| 54M  | 0 | 0   | 3     |
| 58M  | 0 | 0   | 3     |
| 59M  | 1 | 0   | 0     |
| 60M  | 0 | 0   | 3     |
| 61M  | 1 | 0   | 1     |
| 62M  | 0 | 1   | 0     |
| 63M  | 2 | 0   | 0     |
| 67M  | 2 | 0   | 0     |
| 68M  | 0 | 1   | 0     |
| 72M  | 3 | 0   | 0     |
| 73M  | 0 | 1   | 0     |
| 74M  | 2 | 2   | 0     |
| 75M  | 0 | 1   | 0     |
| 77M  | 1 | 1   | 1     |
| 78M  | 0 | 1   | 0     |
| 79M  | 1 | 0   | 0     |
| 84M  | 1 | 1   | 0     |
| 86M  | 2 | 0   | 0     |
| 87M  | 1 | 1   | 0     |
| 91M  | 0 | 2   | 0     |
| 92 M | 0 | 1   | 0     |
| 93M  | 0 | 0   | 2     |
| 96 M | 0 | 1   | 0     |
| 97M  | 3 | 0   | 0     |
| 100M | 1 | 0   | 0     |
| 105M | 0 | 2   | 0     |
| 106M | 0 | 2   | 0     |
| 109M | 1 | 1   | 0     |
| 111M | 0 | 1   | 0     |
| 112M | 0 | 3   | 0     |
| 113M | 1 | 2   | 0     |
| 114M | 0 | 3   | 0     |

|      |   |   |   |
|------|---|---|---|
| 115M | 1 | 3 | 0 |
| 116M | 0 | 3 | 0 |
| 117M | 1 | 3 | 0 |
| 118M | 3 | 0 | 0 |
| 119M | 1 | 2 | 0 |
| 120M | 1 | 2 | 0 |
| 121M | 0 | 1 | 0 |
| 122M | 0 | 1 | 0 |
| 123M | 0 | 2 | 0 |
| 124M | 0 | 2 | 0 |
| 125M | 2 | 3 | 0 |
| 127M | 1 | 2 | 0 |
| 128M | 0 | 3 | 0 |
| 129M | 0 | 3 | 0 |
| 130M | 0 | 3 | 0 |
| 131M | 1 | 1 | 0 |
| 133M | 1 | 0 | 0 |

## Pseudomonads

|     | P | IAA | nitr. |
|-----|---|-----|-------|
| 6P  | 0 | 0   | 3     |
| 7P  | 0 | 3   | 0     |
| 10P | 0 | 3   | 0     |
| 11P | 0 | 2   | 0     |
| 13P | 0 | 3   | 0     |
| 14P | 0 | 3   | 0     |
| 15P | 0 | 0   | 1     |
| 16P | 0 | 1   | 0     |
| 19P | 0 | 1   | 1     |
| 20P | 0 | 1   | 2     |
| 23P | 3 | 3   | 0     |
| 26P | 0 | 1   | 0     |
| 30P | 1 | 0   | 1     |
| 37P | 0 | 2   | 0     |
| 47P | 0 | 3   | 0     |
| 48P | 0 | 1   | 0     |
| 49P | 0 | 1   | 0     |
| 50P | 0 | 1   | 0     |
| 51P | 0 | 1   | 0     |
| 52P | 0 | 1   | 0     |
| 54P | 0 | 1   | 3     |
| 56P | 0 | 0   | 2     |
| 58P | 0 | 1   | 0     |
| 62P | 2 | 0   | 0     |

## Spore-forming bacteria

|      | P | IAA | nitr. |
|------|---|-----|-------|
| 2 B  | 0 | 1   | 0     |
| 3B   | 3 | 1   | 1     |
| 4B   | 1 | 3   | 0     |
| 5 B  | 0 | 3   | 0     |
| 6 B  | 0 | 2   | 0     |
| 7 B  | 0 | 1   | 0     |
| 8 B  | 0 | 1   | 1     |
| 9 B  | 0 | 1   | 0     |
| 10 B | 0 | 1   | 0     |
| 12 B | 0 | 1   | 0     |
| 13 B | 0 | 1   | 0     |
| 15 B | 0 | 1   | 2     |
| 16B  | 3 | 2   | 0     |
| 17 B | 0 | 1   | 0     |
| 18 B | 0 | 1   | 0     |
| 19B  | 1 | 2   | 3     |
| 20 B | 0 | 2   | 0     |
| 21 B | 0 | 1   | 0     |
| 22B  | 1 | 2   | 1     |
| 23 B | 0 | 1   | 0     |
| 24 B | 0 | 2   | 0     |
| 26 B | 0 | 1   | 3     |
| 27B  | 2 | 1   | 0     |
| 28B  | 2 | 0   | 0     |
| 29B  | 1 | 0   | 0     |
| 30 B | 0 | 1   | 3     |
| 31 B | 0 | 2   | 0     |
| 32 B | 0 | 1   | 0     |
| 33 B | 1 | 1   | 0     |
| 34B  | 0 | 2   | 3     |
| 35B  | 3 | 2   | 0     |
| 36 B | 0 | 1   | 0     |
| 37B  | 3 | 1   | 0     |
| 38 B | 0 | 2   | 0     |
| 39 B | 0 | 1   | 0     |
| 40 B | 0 | 1   | 0     |
| 42 B | 0 | 3   | 0     |
| 43 B | 0 | 3   | 0     |
| 45 B | 0 | 3   | 0     |
| 46 B | 0 | 2   | 0     |
| 47 B | 0 | 2   | 0     |
| 48 B | 0 | 3   | 0     |
| 49B  | 1 | 3   | 0     |
| 50B  | 2 | 0   | 0     |
| 51 B | 0 | 1   | 0     |
| 53 B | 0 | 1   | 0     |
| 54 B | 0 | 3   | 0     |
| 55 B | 0 | 1   | 0     |
| 56B  | 2 | 0   | 0     |
| 57 B | 0 | 1   | 0     |
| 58B  | 3 | 3   | 0     |
| 60B  | 0 | 3   | 2     |
| 61B  | 1 | 1   | 1     |
| 62 B | 0 | 3   | 0     |
| 63 B | 0 | 2   | 0     |
| 66 B | 0 | 1   | 0     |

|      |   |   |   |
|------|---|---|---|
| 67 B | 0 | 1 | 2 |
| 68 B | 0 | 1 | 0 |
| 69 B | 0 | 1 | 1 |
| 70 B | 0 | 2 | 0 |
| 71 B | 0 | 3 | 0 |
| 72 B | 0 | 1 | 0 |
| 73 B | 0 | 1 | 0 |
| 74 B | 0 | 3 | 0 |
| 75 B | 0 | 3 | 0 |
| 77B  | 0 | 0 | 3 |
| 79 B | 0 | 1 | 0 |
| 80 B | 0 | 2 | 1 |
| 82 B | 0 | 1 | 0 |
| 83 B | 0 | 3 | 1 |
| 84B  | 1 | 1 | 0 |
| 86 B | 0 | 3 | 0 |
| 87 B | 0 | 3 | 0 |
| 88 B | 0 | 2 | 0 |
| 89 B | 0 | 3 | 0 |
| 90 B | 0 | 3 | 0 |
| 91 B | 0 | 1 | 0 |
| 93 B | 0 | 3 | 1 |
| 94 B | 0 | 2 | 0 |
| 95 B | 0 | 1 | 0 |
| 96 B | 1 | 3 | 0 |

**Table S2-A:** One-way ANOVA (homogeneous group approach) on P-mineralization by mesophilic bacteria.

| Isolate | P-min. ( $\mu\text{M}$ ) | Homogeneous group |    |     |
|---------|--------------------------|-------------------|----|-----|
|         |                          | I                 | II | III |
| 4M      | 3.14                     | ■                 | ■  | ■   |
| 48M     | 3.23                     |                   |    |     |
| 20M     | 3.28                     |                   |    |     |
| 19M     | 3.35                     |                   |    |     |
| 118M    | 3.67                     |                   |    |     |
| 16M     | 3.83                     |                   |    |     |
| 35M     | 4.30                     |                   |    |     |
| 40M     | 4.79                     |                   |    |     |
| 36M     | 4.90                     |                   |    |     |
| 97M     | 8.90                     |                   |    |     |

**Table S2-B:** One-way ANOVA (homogeneous group approach) on P-mineralization by spore-forming bacteria.

| Isolate | P-min. ( $\mu\text{M}$ ) | Homogeneous group |    |     |    |   |
|---------|--------------------------|-------------------|----|-----|----|---|
|         |                          | I                 | II | III | IV | V |
| 96B     | 0.17                     | ■                 | ■  | ■   | ■  | ■ |
| 29B     | 0.54                     |                   |    |     |    |   |
| 61B     | 0.55                     | ■                 | ■  |     |    |   |
| 49B     | 0.66                     |                   |    |     |    |   |
| 33B     | 0.81                     | ■                 | ■  |     |    |   |
| 84B     | 1.33                     |                   |    |     |    |   |
| 22B     | 1.34                     | ■                 | ■  |     |    |   |
| 4B      | 1.38                     |                   |    |     |    |   |
| 19B     | 1.48                     | ■                 | ■  |     |    |   |
| 50B     | 1.50                     |                   |    |     |    |   |
| 28B     | 1.54                     | ■                 | ■  |     |    |   |
| 56B     | 1.64                     |                   |    |     |    |   |
| 27B     | 1.78                     | ■                 | ■  |     |    |   |
| 37B     | 1.79                     |                   |    |     |    |   |
| 35B     | 2.35                     | ■                 | ■  |     |    |   |
| 16B     | 2.36                     |                   |    |     |    |   |
| 58B     | 2.56                     | ■                 | ■  |     |    |   |
| 3B      | 2.89                     |                   |    |     |    |   |

**Table S2-C:** One-way ANOVA (homogeneous group approach) on P-mineralization by pseudomonads.

| Isolate | P-min. ( $\mu\text{M}$ ) | Homogeneous group |
|---------|--------------------------|-------------------|
| 30P     | 0.64                     | ■                 |
| 62P     | 0.91                     |                   |
| 23P     | 2.17                     |                   |

**Table S2-D:** One-way ANOVA (homogeneous group approach) on P-mineralization by actinobacteria.

| Isolate | P-min. ( $\mu\text{M}$ ) | Homogeneous group |     |
|---------|--------------------------|-------------------|-----|
| 93A     | 0.13                     | [A]               |     |
| 17A     | 0.14                     |                   |     |
| 31A     | 0.14                     |                   |     |
| 122A    | 0.16                     |                   |     |
| 80A     | 0.20                     |                   |     |
| 165A    | 0.35                     |                   |     |
| 3A      | 0.47                     |                   |     |
| 149A    | 0.49                     |                   |     |
| 104A    | 0.50                     |                   |     |
| 151A    | 0.62                     |                   |     |
| 71A     | 1.27                     |                   | [B] |
| 48A     | 1.50                     |                   | [C] |
| 90A     | 1.94                     |                   | [D] |
| 23A     | 2.99                     |                   | [E] |
| 25A     | 3.96                     |                   | [F] |
| 12A     | 8.01                     | [G]               |     |
